# Supplementary material
Source: HighWire-hosted journal article supplement (https://erj.ersjournals.com/content/59/4/2100798)
Supplement: inline-supplementary-material-3 [file inline-supplementary-material-3.pdf]

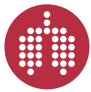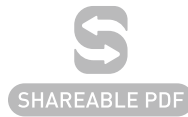

# Ex vivo delivery of regulatory T-cells for control of alloimmune priming in the donor lung

Ei Miyamoto , Akihiro Takahagi, Akihiro Ohsumi, Tereza Martinu, David Hwang, Kristen M. Boonstra, Betty Joe, Juan Mauricio Umana, Ke F. Bei, Daniel Vosoughi, Mingyao Liu, Marcelo Cypel, Shaf Keshavjee and Stephen C. Juvet

Latner Thoracic Surgery Research Laboratories, University Health Network, University of Toronto, Toronto, ON, Canada.

Corresponding author: Stephen C. Juvet ([stephen.juvet@uhn.ca](mailto:stephen.juvet@uhn.ca))

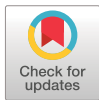

Shareable abstract (@ERSpublications)

A recipient-derived lung allograft-directed regulatory T-cell therapy administered prior to transplantation is feasible in rat and human lungs and demonstrates evidence of immune regulation post-transplant <https://bit.ly/3D8MCBo>

**Cite this article as:** Miyamoto E, Takahagi A, Ohsumi A, *et al.* Ex vivo delivery of regulatory T-cells for control of alloimmune priming in the donor lung. *Eur Respir J* 2022; 59: 2100798 [DOI: 10.1183/13993003.00798-2021].

This single-page version can be shared freely online.

Copyright ©The authors 2022.  
For reproduction rights and  
permissions contact  
[permissions@ersnet.org](mailto:permissions@ersnet.org)

Received: 17 March 2021  
Accepted: 17 Aug 2021

## Abstract

**Background** Survival after lung transplantation (LTx) is hampered by uncontrolled inflammation and alloimmunity. Regulatory T-cells (Tregs) are being studied as a cellular therapy in solid organ transplantation. Whether these systemically administered Tregs can function at the appropriate location and time is an important concern. We hypothesised that *in vitro*-expanded recipient-derived Tregs can be delivered to donor lungs prior to LTx via *ex vivo* lung perfusion (EVLP), maintaining their immunomodulatory ability.

**Methods** In a rat model, Wistar Kyoto (WKy) CD4<sup>+</sup>CD25<sup>high</sup> Tregs were expanded *in vitro* prior to EVLP. Expanded Tregs were administered to Fisher 344 (F344) donor lungs during EVLP; left lungs were transplanted into WKy recipients. Treg localisation and function post-transplant were assessed. In a proof-of-concept experiment, cryopreserved expanded human CD4<sup>+</sup>CD25<sup>+</sup>CD127<sup>low</sup> Tregs were thawed and injected into discarded human lungs during EVLP.

**Results** Rat Tregs entered the lung parenchyma and retained suppressive function. Expanded Tregs had no adverse effect on donor lung physiology during EVLP; lung water as measured by wet-to-dry weight ratio was reduced by Treg therapy. The administered cells remained in the graft at 3 days post-transplant where they reduced activation of intra-graft effector CD4<sup>+</sup> T-cells; these effects were diminished by day 7. Human Tregs entered the lung parenchyma during EVLP where they expressed key immunoregulatory molecules (CTLA4<sup>+</sup>, 4-1BB<sup>+</sup>, CD39<sup>+</sup> and CD15s<sup>+</sup>).

**Conclusions** Pre-transplant Treg administration can inhibit alloimmunity within the lung allograft at early time points post-transplant. Our organ-directed approach has potential for clinical translation.
